RESEARCH ARTICLE

# Functional variation in a key defense gene structures herbivore communities and alters plant performance

Nora Adam<sup>1,2aa</sup>, Mario Kallenbach<sup>1ab</sup>, Stefan Meldau<sup>1ac</sup>, Daniel Veit<sup>3</sup>, Nicole M. van Dam<sup>2</sup>, Ian T. Baldwin<sup>1\*</sup>, Meredith C. Schuman<sup>1,2\*</sup>

**1** Department of Molecular Ecology, Max Planck Institute for Chemical Ecology, Jena, Germany, **2** German Centre for Integrative Biodiversity Research (iDiv), Leipzig, Germany, **3** Technical Service, Max Planck Institute for Chemical Ecology, Jena, Germany

<sup>aa</sup> Current address: Research Group Sequestration and Detoxification in Insects, Max Planck Institute for Chemical Ecology, Jena, Germany

<sup>ab</sup> Current address: Shimadzu Deutschland GmbH, Technisches Büro, Jena, Germany

<sup>ac</sup> Current address: KWS SAAT AG, Einbeck, Germany

\* [mschuman@ice.mpg.de](mailto:mschuman@ice.mpg.de) (MCS); [baldwin@ice.mpg.de](mailto:baldwin@ice.mpg.de) (ITB)

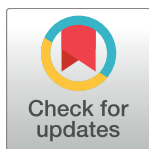

**OPEN ACCESS**

**Citation:** Adam N, Kallenbach M, Meldau S, Veit D, van Dam NM, Baldwin IT, et al. (2018) Functional variation in a key defense gene structures herbivore communities and alters plant performance. PLoS ONE 13(6): e0197221. <https://doi.org/10.1371/journal.pone.0197221>

**Editor:** Renee M. Borges, Indian Institute of Science, INDIA

**Received:** October 30, 2017

**Accepted:** April 28, 2018

**Published:** June 6, 2018

**Copyright:** © 2018 Adam et al. This is an open access article distributed under the terms of the [Creative Commons Attribution License](https://creativecommons.org/licenses/by/4.0/), which permits unrestricted use, distribution, and reproduction in any medium, provided the original author and source are credited.

**Data Availability Statement:** The raw data and scripts for the statistical analyses of this paper are available at <https://edmond.mpd.mpg.de/imeji/>, DOI: <https://dx.doi.org/10.17617/3.13>.

**Funding:** This work was supported by the Max Planck Society (N.A., M.K., D.V., S.M., I.T.B.); the German Centre for Integrative Biodiversity Research (iDiv) Halle-Jena-Leipzig, funded by the German Research Foundation (FZT 118; N.A., S.M., N.M.v.D., I.T.B., M.C.S.); European Research Council advanced grant Clockwork Green to I.T.B.

## Abstract

Plant genetic diversity structures animal communities and affects plant population productivity. However, few studies have investigated which traits are involved and the mechanisms mediating these effects. We studied the consequences of varying the expression of a single biosynthetic gene in jasmonate (JA) defense hormones, which are essential for defense against herbivores but constrain plant growth, in experimental mesocosm populations of wild tobacco (*Nicotiana attenuata*) plants under attack from three native herbivores. *Empoasca* leafhoppers preferentially attack JA-deficient *N. attenuata* plants in nature, and the specialist *Tupiocoris notatus* mirids avoid *Empoasca*-damaged plants. However, in experimental mesocosm populations having equal numbers of wild-type (WT) and JA-deficient plants that are silenced in the expression of the biosynthetic gene *lipoxygenase 3* (*LOX3*), *Empoasca* sp. attacked both genotypes. *Empoasca* sp. damage, rather than JA, determined *T. notatus* damage, which was reduced in mixed populations. The growth of specialist *Manduca sexta* larvae was reduced on WT vs. as*LOX3* monocultures, but differed in mixtures depending on caterpillar density. However, seed capsule number remained similar for WT and as*LOX3* plants in mixtures, not in monocultures, in two experimental scenarios reflecting high and low caterpillar attack. At high caterpillar density, WT plants growing in mixtures produced more seed capsules than those growing in monocultures while seed production of as*LOX3* plants did not differ by population type. However, at low caterpillar density, as*LOX3* plants growing in mixed populations produced more seed capsules than those growing in monoculture, while seed capsule production did not differ for WT by population type. Thus, mixed populations had a more stable output of seed capsules under the two scenarios. This may result from a balance between JA-mediated herbivore defense and plant competitive ability in mixed populations.

(number 293926; I.T.B., M.C.S.), and in part by the Collaborative Research Centre Chemical Mediators in Complex Biosystems – ChemBioSys (CRC 1127) funded by the German Research Foundation (I.T.B., M.C.S.).

**Competing interests:** The authors have declared that no competing interests exist.

## Introduction

The diversity of traits in a species, and of the genes which control them, are the raw material for evolution by natural selection [1]. Genetic diversity in plant populations furthermore influences the composition of other trophic levels and the nature of their interactions as much as, or more than species richness, and also affects energy flow, nutrient cycling, productivity and stability of ecosystems [2–8]. However, we still have little knowledge of how intraspecific variation in plant traits might affect herbivore community dynamics and consumption by herbivores, or the consequences of increasing diversity on herbivore traits and species interactions [9]. Furthermore, most studies attempting to scale from genetic variation to effects at the community and ecosystem levels have been correlative: these have correlated or manipulated numbers of plant genotypes without quantifying the resulting trait variation; or else have manipulated traits having a complex genetic background, often without measuring underlying genetic variation [10–12]. As a consequence, we are missing links in the mechanistic chain from genetic variation, to functional traits, to community-level effects [4,13].

Recently, we argued that an approach manipulating single genes with large effects can offer greater predictive power and mechanistic understanding in trait-based studies of biodiversity, and that many important traits can be manipulated by modifying single key genes [6]. We define key genes as those which are not essential for growth and development, but regulate traits that significantly contribute to the Darwinian fitness of individuals in a particular ecological context, usually as measured by correlates like reproduction, survival, or growth. Thus key genes are precision tools for manipulating traits of ecological interest, even though the mechanisms of natural variation in a trait may differ. This approach provides explanatory power for linking intraspecific diversity to effects at other organizational levels by indicating focal measurements based on knowledge of gene function, as well as pointing to specific gene products which could be traced through interaction webs [14]. For instance, variation in a single key gene in nicotine biosynthesis in the wild coyote tobacco *Nicotiana attenuata* (Solanaceae), *putrescine methyltransferase* (PMT), affected herbivore, predator and pollinator communities with consequences for plant performance [15–17], and tri-trophic effects of nicotine have since been traced to specific differences in insect nicotine metabolism [18]. In this study, we use the wild tobacco *N. attenuata* and three of its native herbivores as an ecological model system to investigate community-level effects of variation in a key gene.

*N. attenuata* plants in their natural populations vary in defense traits including biosynthesis and signaling of the defense hormone jasmonate (JA) [19,20]. The generalist *Empoasca* sp. leafhopper is a piercing-sucking herbivore that feeds on phloem and cell contents. *Empoasca* sp. was observed to feed on other plant species neighboring *N. attenuata* plants in their native habitat. Among these plants are *Cucurbita foetidissima*, *Datura wrightii*, *Solanum americanum*, and *Mirabilis multiflora* [20,21]. Although, *N. attenuata* plants are an uncommon host for *Empoasca* sp. [20,21], this herbivore can feed on *N. attenuata* plants with reduced accumulation of the defense-related jasmonate (JA) hormones. *Empoasca* sp. females were even reported to oviposit on JA-deficient plants, as indicated by the presence of feeding, wingless nymphs [21]. *Empoasca* sp. select their host based on the plant traits perceived during the initial probing phase [20]. Therefore, *Empoasca* sp. will likely to continue feeding on plants that display the preferred traits, for example JA deficiency in *N. attenuata* plants or else, the highly mobile opportunistic feeder will search for other suitable host plants.

The herbivore *Tupiocoris notatus* (Distant) (Hemiptera: Miridae) is a specialist mirid bug that frequently colonizes *N. attenuata* plants early in the growing season as well as some other solanaceous plants, for example *Datura wrightii*, and feeds on leaf cell contents [22–26]. *T. notatus* females insert their eggs in the leaf midrib and into leaf veins as well as into the stem of

*N. attenuata* plant [27]. The emerged wingless nymphs complete their life cycle on *N. attenuata* plants and both adults and nymphs are highly mobile within the plant [28]. This specialist preferentially feeds on younger leaves of the plant [29]. Life history traits of *T. notatus* are not directly affected by host plant JA deficiency [27,30]. However, *T. notatus* damage is reduced on *N. attenuata* plants infested by the generalist leafhopper *Empoasca* sp. [30]. Although *T. notatus* is one of the most abundant herbivores on *N. attenuata* plants, its damage does not significantly affect plant fitness in nature [26]. In contrast, the chewing larvae of the Solanaceous specialist *Manduca sexta* (Lepidoptera, Sphingidae) are among the most damaging insect herbivores attacking *N. attenuata* plants, and these larvae grow larger on JA-deficient plants [31]. *Manduca sexta* moths avoid specific plant volatiles which are regulated by jasmonic acid [25]. This would indicate that caterpillar density on asLOX3 plants might be high [25]. Also, *Manduca sexta* larvae may have increased mortality and decreased oviposition on plants infested by *T. notatus* in nature [26].

We hypothesized that varying the production of JA within experimental *N. attenuata* populations by manipulating a single key biosynthetic gene would alter feeding damage and performance of these three native herbivores and consequently plant fitness outcomes. We tested this hypothesis in two mesocosm experiments, where we exposed monocultures of either wild-type (WT) plants or of plants rendered deficient in the JA biosynthetic gene *Lipoxygenase 3* by RNAi (antisense, asLOX3), and a mixed culture comprising equal numbers of WT and asLOX3, to different herbivory regimes. We then measured herbivore damage and performance, and plant growth and reproduction. We choose *LOX3* as a key gene in the JA pathway, since plants abrogated in its expression produce ca. 50% the JA concentration of WT plants, reflecting natural diversity in JA production [19,20]. Furthermore, this gene showed large effects on plant productivity and herbivore performance, and multiple asLOX3 lines have been characterized and shown to vary only in their JA production and resulting effects [21,31–33].

We predicted that mixtures would receive damage from *Empoasca* sp. intermediate between WT monocultures (low damage) and asLOX3 monocultures (high damage). We furthermore predicted that *Empoasca* sp. damage would be a better predictor of *T. notatus* damage than plant genotype [27,30], with the alternative hypothesis being that plant genotype was in fact a better predictor. For *M. sexta* larval growth, we similarly predicted that either plant genotype would be a better predictor of *M. sexta* growth than damage from the other two herbivores [31], or that *T. notatus* damage would be a better predictor than plant genotype if *T. notatus* had strong effects on *M. sexta* performance in the absence of predators [26]. Finally, we also had two non-exclusive hypotheses for plant fitness outcomes: that they would be determined primarily by *M. sexta* attack patterns; and that fitness correlates would be more consistent for mixtures than monocultures as a result of the balance between the expected defense advantage of WT plants, and the known growth advantage of asLOX3 plants [31,32]. From our data, we conclude that variation in a single key defense gene could have community-level effects by altering damage patterns by native herbivores, caterpillar performance, and, as a consequence, determining plant fitness outcomes.

## Materials and methods

### Mesocosm experimental design

To test the consequences of varying JA deficiency in plant populations under attack by three native herbivores, two experiments were performed in a glasshouse mesocosm. The glasshouse mesocosm reflects a semi-natural condition, where herbivores can choose to move among different plant populations. The two experiments were designed to reflect two possible ecological scenarios, where WT and JA-deficient asLOX3 plants were grown as replicated monocultures,

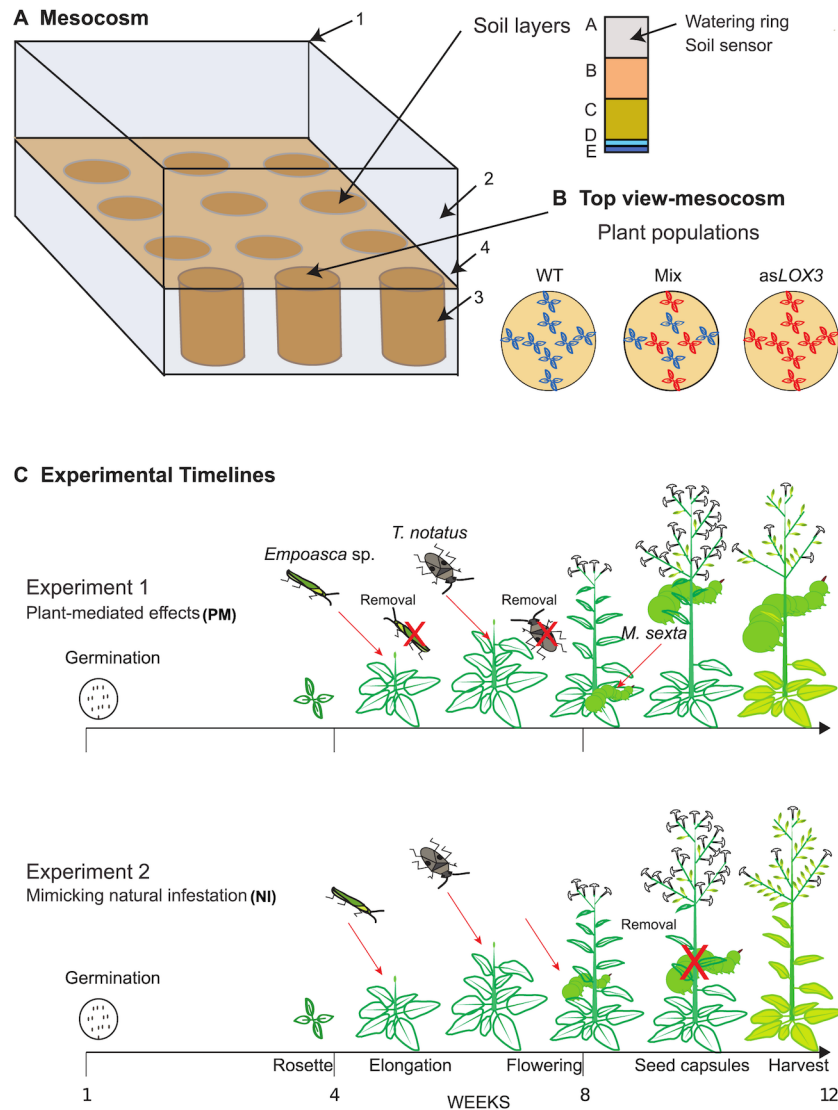

**Fig 1. Experimental design.** (A) The experimental mesocosm (4 x 3 x 2.5 m l x w x h) consists of 12 containers within a screen- and plastic-enclosed box in a glasshouse. Aluminum containers filled with soil (1, RSONline), a stainless steel 0.8 mm mesh frame (2, Scherer Insektenschutz), and a polypropylene container and plates (3 and 4, HL Kunststofftechnik) were used to build the mesocosm. *Nicotiana* substrate and other substrates are described in **Tables A and B in S1 File**. (B) Eight *N. attenuata* plants from either the same genotype (monoculture) or containing four of each genotype (mixed culture) were planted in each mesocosm container. (C) The experimental timeline shows the differences between Experiment 1 (Plant-mediated, PM) and Experiment 2 (Natural infestation, NI), including all other experimental steps (germination, transfer to the glasshouse, planting, herbivore infestation and data collection of growth and fitness parameters). Xiang Li, flower and seed capsule icons.

<https://doi.org/10.1371/journal.pone.0197221.g001>

and mixtures comprising equal numbers of each genotype (Fig 1A, Fig 1B). The mesocosm has a total of 12 containers allowing for a total of four replicates per culture type (mixture, WT and asLOX3 monocultures) in each experiment. In the two experiments, initially eight plants from either the same genotype (monocultures) or comprising four of each genotype in an alternating pattern (mixture; Fig 1B), were planted together per one mesocosm container, forming the three culture types. We initially planted a total of 96 plants in each mesocosm experiment, where  $n = 8$  plants were planted in one mesocosm container. Of 96 plants initially planted in each experiment, 15 and 7 individual plants distributed in different cultures were excluded

from the analyses in the PM- and NI Experiments, respectively, because these plants were not healthy (stunted growth), did not survive to elongation or flowering stage, or had cumulative counts which decreased over time, which was attributed to measurement errors, and therefore, we had  $n = 4-8$  plants/culture type for the statistical analysis. When either one WT or asLOX3 plant had to be excluded from the mixtures, a randomly chosen plant from the other genotype was also excluded to balance genotype frequency. This ensured that results of the mixtures are not a product of unequal numbers of the genotypes.

In the two mesocosm experiments, three native herbivores were added according to the order of their natural appearance observed over more than 10 years of field work in the portion of their native habitat in southwestern Utah: adult *Empoasca* sp. were allowed to disperse in the mesocosm once the majority of plants were elongating ( $n = 5$ /plant, but released not onto plants directly but at three points evenly distributed across the mesocosm); then adults of *T. notatus* were added one week later ( $n = 5$ /plant, but again not directly to plants but released at three points distributed across the mesocosm); and finally, freshly hatched neonates of *M. sexta* were added to mimic oviposition ( $n = 2$ /plant directly to 4 plants/population, i.e., every second plant in a population), once the majority of plants flowered. Both *Empoasca* sp. and *T. notatus* were released in three standard positions distributed evenly among the 12 mesocosm containers and not directly over any container, in the center and at the edges of the mesocosm. This allows an equal initial distribution of herbivores on the different plant populations.

**Plant-mediated effects.** In Experiment 1, we investigated **Plant-Mediated (PM)** effects by removing the first two herbivores after each had fed alone on the plant populations. Herbivore species might interact directly [34], and the removal of each species before adding the subsequent species avoided direct interactions between herbivore species. Here, infestations with *Empoasca* sp. proceeded for ca. one week and then insects were collected and removed from the experiment. *T. notatus* adults were then added until a majority of plants flowered, at which time they also were collected and removed after ca. one week of infestation. Damage from each herbivore was estimated upon removal. It should be noted that we cannot completely exclude that a few individuals were overlooked during removal. We also cannot exclude that the insects, specifically the specialist *T. notatus*, laid eggs on plants. Thus to avoid unwanted herbivore presence, we regularly monitored for nymphs. Our removal strongly minimizes effects from direct herbivore interaction by drastically reducing the population of each species in the experimental design. Larvae of *M. sexta* were added to the plants after simulated oviposition (distribution of neonates) and because it is generally the last herbivore species to arrive and was the last species added, larvae of *M. sexta* were allowed to remain until they consumed large portions of plants in the mesocosm (the majority of caterpillars were close to pupation at this stage). Caterpillars were allowed to move between plant populations of their own volition, reflecting *M. sexta* outbreaks and allowing simulation of a high rate of attack *M. sexta* larvae, the most damaging of these herbivores for the plant. At this high attack rate, *M. sexta* larvae began to move between populations after approximately two weeks.

**Natural infestation.** In Experiment 2 (**Natural Infestation, NI**), we mimicked the more common natural situation of herbivore co-occurrence, allowing all herbivores to remain throughout the experiment, permitting co-occurrence. Since we simulated unusually (but not unprecedented) high rates of attack by *M. sexta* larvae in the PM Experiment, we were also interested in simulating a more common, lower rate of attack in the NI Experiment. For this reason, *M. sexta* larval density was reduced after 9 days of feeding to  $n = 3$ /population, once larvae became mobile between plants to mimic natural dispersal outside of the small area defined by the mesocosm or population reduction due to predators, and all caterpillars were removed after 12 days [35]. This reduction restricted the movement of remaining larvae so that they remained within plant populations and did not wander between populations.

## Plant material and growth conditions

Seeds of wild-type (WT, 31<sup>st</sup> inbred generation) *Nicotiana attenuata* Torr. Ex. Watts. (Solanaceae) and the third transformed generation (T3) of a transgenic line with reduced levels of JA (as*LOX3*, homozygous harboring a single T-DNA insertion, line number A-300 [31]) were used in this study. The WT line was generated from seeds collected in 1988 from a natural population at the DI Ranch in southwestern Utah [23]. In both experiments, germination was performed as previously described [36,37] except that in the NI Experiment, seeds were first incubated for 3 d at 30°C and then 7 d at 26°C to counteract seasonal fluctuations in dormancy. After 10 d, seedlings were transferred to Teku pots and kept under glasshouse conditions as previously described [36,37]. Twelve to thirteen days later, plants were transferred to an experimental mesocosm (Fig 1) in the remote Isserstedt glasshouse of the Max Planck Institute for Chemical Ecology in Jena, Germany, used for experiments with highly mobile insects; and planted into 12 mesocosm containers (Fig 1A; Polypropylen, HL Kunststofftechnik, Ø700 x 1000 mm). The plants were planted into the top of four soil layers (Tables A, B, C in S1 File). Soil moisture and temperature in the mesocosm were also monitored (see S2 File). Day- and nighttime temperatures in the glasshouse were 26–28°C and 20–22°C, respectively, as previously described [36]. The photoperiod was a constant 16 h (6:00–22:00) consisting of natural photoperiods (latitude 50°N) with day extension lighting provided by high-pressure sodium (HPS) lamps delivering a photosynthetic photon flux (PPF) of 160  $\mu\text{mol m}^{-2} \text{s}^{-1}$ . Plants were watered with 1.2 L/population every second day using an automated drip irrigation system. The irrigation system consisted of 12 pumps (Wilhelm Keller GmbH & Co. KG), one for each container, controlled with a Siemens LOGO (RSONline). Each pump was connected with a tube (PUN 6 x 4 mm) to a check valve (Jenpneumatik), which was connected to a dripping ring (Conrad). A polypropylene cross (HL-Kunststofftechnik) was placed over the ring to stabilize its form. When plants elongated, watering was increased to 2 L/population on the same schedule. Plants were fertilized once a week with Peters Allrounder (1 g/L water, Table C in S1 File). Soil moisture and temperature were monitored throughout experiments (S2 File).

In a preliminary experiment conducted in small cages, prior to the mesocosm experiments, plants were germinated and grown as described for the PM Experiment except that single plants were planted in 4 L pots and transported to the remote Isserstedt glasshouse 10 d after transfer to Teku pots, and were watered and fertilized by hand.

## Insects

*Empoasca* sp. (Hemiptera: Cicadellidae) and *Tupiocoris notatus* Distant (Hemiptera: Miridae) were collected from Lytle Preserve in southwestern Utah. *Empoasca* sp. was collected from *Cucurbita foetidissima* and *T. notatus* from *N. attenuata* plants. Both species were maintained in a colony in the Isserstedt glasshouse as previously described [20,26]. *Manduca sexta* Linnaeus (Lepidoptera: Sphingidae) eggs were collected from an in-house colony at the Max Planck Institute for Chemical Ecology in Jena. Collected eggs were incubated in a growth chamber (Snijders Scientific) at 26°C/16 h light, 24°C/8 h darkness and 65% relative humidity. Freshly hatched neonates were used for caterpillar growth assays.

## Pre-mesocosm experiment: *T. notatus* and *Empoasca* sp. interaction

To analyze the interaction between *T. notatus* and *Empoasca* sp. in small scale and more controlled conditions, we conducted an experiment prior to the mesocosm experiments in which one genotype (WT or as*LOX3*) was exposed to either *T. notatus* alone, or *T. notatus* and *Empoasca* sp. under glasshouse conditions. In total, seven plants of each genotype (WT or as*LOX3*) were used in this experiment. The seven plants formed a total of four replicates of

each genotype per herbivore treatment, where either two plants or one lone plant of the same genotype were caged together. Plants then were exposed to herbivore treatment by either simultaneous exposure to adults of *T. notatus* and *Empoasca* sp., or only to *T. notatus* (10 insects/herbivore species/plant), for one week. The infestation was repeated for another two weeks. In the last week, only 5 insects/species/plant were added to each cage, for a total of 25 insects/species/plant added over the course of the experiment. To determine *T. notatus* and *Empoasca* sp. damage, high resolution pictures of 15 leaves per plant in standardized rosette, stem, and young leaf positions were taken. Damage was evaluated with Photoshop and expressed as a percentage of total damage caused to the plant. *Empoasca* sp. and *T. notatus* have distinct damage characteristics that make it possible to distinguish damage caused by each herbivore [20,30]. For example, *Empoasca* sp. damage is characterized by appearing of small pale green to white dots that are often connected on the upper side of the leaf. *T. notatus* damage appears as relatively faded regions on the upper side of the leaf with distinct black dots on the underside of the leaf (Fig A in S1 File).

### Herbivory damage and caterpillar growth assay

Each plant was carefully checked for feeding damage based on the damage characteristic of *Empoasca* sp. and *T. notatus*, and leaf area removal by *M. sexta* caterpillars. Damage was estimated on a scale with single percentage point gradations, except for a few plants with very low damage, where finer gradations below one percentage point were used. The percentage values were derived from visual damage assessment by counting damaged leaves and estimating their area fraction of the total plant similarly to previous studies [6,38]. All damage estimates were performed by N. A. Damage caused by *Empoasca* sp. and *T. notatus* was estimated after ca. one week of infestation in both experiments. Freshly hatched *M. sexta* neonates were added in standardized positions to one rosette and one lower stem leaf at 63 and 54 d post-germination in the PM- and NI Experiments, respectively. Differences in absolute number of days of herbivore treatment between experiments correspond to differences in plant growth. Physiological processes such as elongation and flowering were used as indicators to determine infestation time, rather than absolute number of days post-germination. Caterpillar mass was measured at days 5, 8, 11 and 15 post-addition in the PM Experiment, and at days 5, 9 and 12 post-addition in the NI Experiment, using a laboratory balance (METTLER AE100,  $\pm 0.1$ mg). Damage caused by *M. sexta* larvae was estimated only in the NI Experiment, on days 10 and 12 post-infestation, to have a final measure of their damage. Cumulative damage data from day 12 were then used for statistical analysis.

### Plant growth and fitness parameters

Maximum rosette diameter was measured in the PM Experiment on days 30, 34 and 38 post-germination until elongation, by laying a ruler over the rosette. In the NI Experiment, we measured rosette diameter once plants had elongated (day 41). Plant height was measured on days 34, 38 and 52 (PM Experiment) and days 41, 53,63 (NI Experiment) post-germination, respectively, from the stem base to the tip of the apical inflorescence by placing a measuring stick near the stem. Once plants began flowering, the number of open flowers per plant was counted on days 44, 52, 60, 70 and 75 post-germination in the PM Experiment, and days 46, 56, 66, 74 and 81 in the NI Experiment. Numbers of ripe seed capsules per plant were counted at three time points in the PM Experiment (days 63, 70 and 75). In the NI Experiment, the number of ripe seed capsules per plant was counted until all plants had senesced and no new flowers were produced (on days 60, 66, 74 and 81). Plants were harvested when large portions of whole plant populations were consumed by *M. sexta* larvae (PM Experiment), or when most plants had senesced (NI Experiment). Plant fresh weight and dry weight was measured at harvest.

## Statistical analyses

Data were evaluated at population and genotype levels. Population level refers to data collected from all monitored plants in one mesocosm container. The genotype level represents data collected from either WT or asLOX3 plants growing in mixed culture and compared to data collected from the corresponding genotypes growing in monoculture. All statistical tests were performed with R (R-Project; <http://www.r-project.org>, [39]). To account for pseudo-replication in the design, data were analyzed either with linear mixed effects models [40] or by using the mean value of observations from one mesocosm container (population). ANOVAs followed by Tukey HSD *post-hoc* tests were used when model assumptions were met. Non-parametric data were analyzed with Kruskal-Wallis rank sum tests followed by Dunn's test for multiple comparisons, or generalized least squares models (GLS). All damage data were arcsine transformed.

## Results

### *Empoasca* sp. caused similarly high damage to asLOX3 monocultures and mixtures, determining *T. notatus* damage patterns

In a preliminary experiment (see pre-mesocosm experiment: *T. notatus* and *Empoasca* sp. interaction), *T. notatus* damage was reduced when plants were co-infested with *Empoasca* sp. (Student's t-tests within each genotype,  $df = 6$ ,  $t = 3.569$ ,  $P = 0.011$ ,  $d = 2.523$  and  $t = 2.661$ ,  $P = 0.037$ ,  $d = 1.881$  for WT and asLOX3, respectively; Fig 2A). Furthermore, *Empoasca* sp. and *T. notatus* showed contrasting preferences for young and old leaves on asLOX3 plants (Student's t-tests and Wilcox test between insects within each leaf type;  $df = 6$ ,  $t = -8.996$ ,  $P < 0.001$ ,  $d = 6.361$ ,  $t = -1.113$ ,  $P = 0.308$ ,  $d = 0.787$ ,  $W = 16$ ,  $P = 0.026$ ,  $d = 3.181$  for rosette, stem and young leaves, respectively; Fig 2B, Fig 2C).

In the mesocosm, and at the population level, asLOX3 monocultures and mixtures received significantly more damage from *Empoasca* sp. than did WT monocultures in the PM Experiment (Table 1, Fig 3A). At the genotype level, WT plants in monocultures received less damage

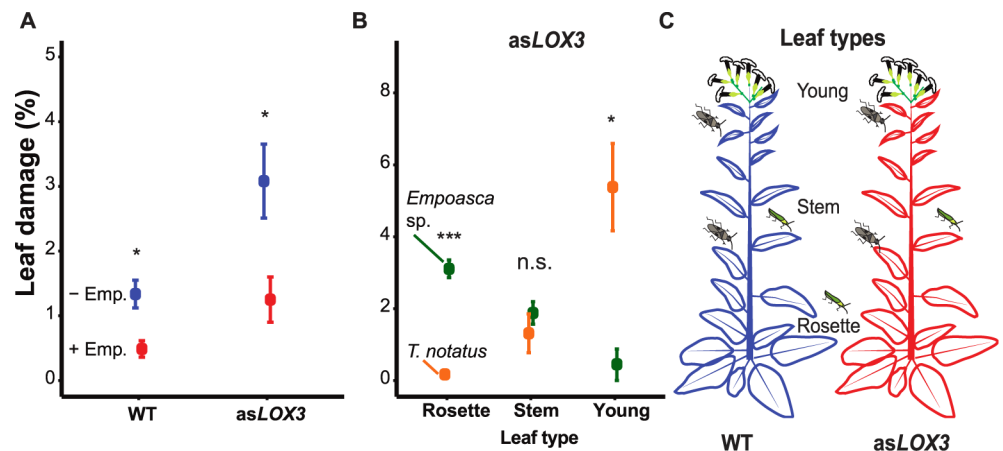

**Fig 2. *T. notatus* causes less damage on *Empoasca* sp. co-infested *N. attenuata* plants (WT and asLOX3) and these herbivores have opposite preferences for young and old leaves.** Values are mean ± SE. (A) *T. notatus* caused significantly less damage on *Empoasca* sp. co-infested plants on WT and asLOX3 plants. (B) *Empoasca* sp. feeds generally more on asLOX3 rosette leaves than *T. notatus*; the opposite pattern was observed on young leaves (data are for herbivores feeding on asLOX3 *N. attenuata* plants). (C) Description of within-plant damage distribution and leaf positions on asLOX3 *N. attenuata* plants attacked by the herbivores. Damage data were arcsin square root transformed. \* $P < 0.05$  in Student's t-tests between treatments (+/- *Empoasca* sp.) within each genotype, \*\*\* $P < 0.001$  in Student's t-tests and \* $P < 0.05$  in Wilcox test between insects within each leaf type. n.s. = not significant.

<https://doi.org/10.1371/journal.pone.0197221.g002>



**Table 1. Statistical summary for *Empoasca* sp. damage.**

| Herbivore           | Experiment            | Level      | Test          | Test-statistic | df   | Pairwise test | Comparison                | P            | d            |
|---------------------|-----------------------|------------|---------------|----------------|------|---------------|---------------------------|--------------|--------------|
| <i>Empoasca</i> sp. | PM                    | Population | ANOVA         | F = 13.56      | 2,9  | TukeyHSD      | asLOX3 vs Mix             | 0.577        | 0.679        |
|                     |                       |            |               |                |      |               | asLOX3 vs WT              | <b>0.002</b> | <b>4.167</b> |
|                     |                       |            |               |                |      |               | Mix vs WT                 | <b>0.009</b> | <b>2.579</b> |
|                     |                       | Genotype   | ANOVA         | F = 9.684      | 3,12 | TukeyHSD      | asLOX3_mono vs asLOX3_mix | 0.999        | 0.079        |
|                     |                       |            |               |                |      |               | asLOX3_mono vs WT_mono    | <b>0.003</b> | <b>4.167</b> |
|                     |                       |            |               |                |      |               | asLOX3_mix vs WT_mono     | <b>0.002</b> | <b>3.048</b> |
|                     | asLOX3_mono vs WT_mix |            |               |                |      |               | 0.231                     | 1.588        |              |
|                     | NI                    | Population | ANOVA P > 0.3 | F = 1.151      | 2,9  |               |                           |              |              |
|                     |                       |            | ANOVA P > 0.4 | F = 0.932      | 3,12 |               |                           |              |              |

<https://doi.org/10.1371/journal.pone.0197221.t001>

than asLOX3 plants and WT plants in mixtures, but this difference was not statistically significant for the NI experiment (Table 1, Fig 3B).

In contrast, *Empoasca* sp. attacked asLOX3 plants at similar rates regardless of whether they were growing in monoculture or mixture, whereas damage on the two plant genotypes in mixtures was similar (Table 2, Fig 3B). Results from the NI Experiment for *Empoasca* sp. damage at the genotype level showed similar trends as in the PM Experiment (Table 2, Fig 3C, Fig 3D) but the damage rate did not differ significantly and was generally lower than in the PM Experiment.

In contrast to *Empoasca* sp., *T. notatus* caused more damage to WT monocultures than to asLOX3 mono- and mixed cultures, which had similarly low damage rates (Table 2, Fig 3E, Fig 3G).

At the genotype level, *T. notatus* caused more damage on WT growing in monocultures compared to WT in mixtures, in both experiments. Damage caused to WT growing in monocultures was higher than damage on asLOX3 plants regardless of the culture identity in the NI Experiment, and did not differ statistically in the PM Experiment. Damage caused to both genotypes in mixture was similar to each other and to damage on asLOX3 plants growing in the monocultures (Table 2, Fig 3F, Fig 3H).

### ***M. sexta* caterpillars grew smaller and tended to cause less damage on WT monocultures compared to asLOX3 monocultures, while mixtures showed mixed results**

In both experiments, caterpillars grew smaller on WT monocultures in comparison to asLOX3 monocultures (linear mixed-effects model, Table 3, Fig 4A, Fig 4B). However, larval growth showed different results in mixtures between experiments. While growth in mixtures differed from WT, but not from asLOX3 monocultures in the PM Experiment, it was intermediate in the NI Experiment (Table 3, linear mixed-effects model, Fig 4A; GLS, Fig 4B).

The growth of caterpillars depended on the identity of the plant genotype rather than on population identity. For example, the growth of caterpillars feeding on asLOX3 plants in mixed versus monocultures did not differ (linear mixed-effects model, Table 3, Fig B in S1 File).

WT monocultures tended to receive less damage by *M. sexta* caterpillars than mixed and asLOX3 monocultures, but the differences were not statistically significant (Kruskal-Wallis rank sum test,  $X^2 = 4.769$ ,  $P = 0.092$ ; Fig 4C). Feeding damage from *M. sexta* did not differ significantly among genotypes (Kruskal-Wallis rank sum test,  $X^2 = 5.417$ ,  $P = 0.143$ ; Fig 4D).

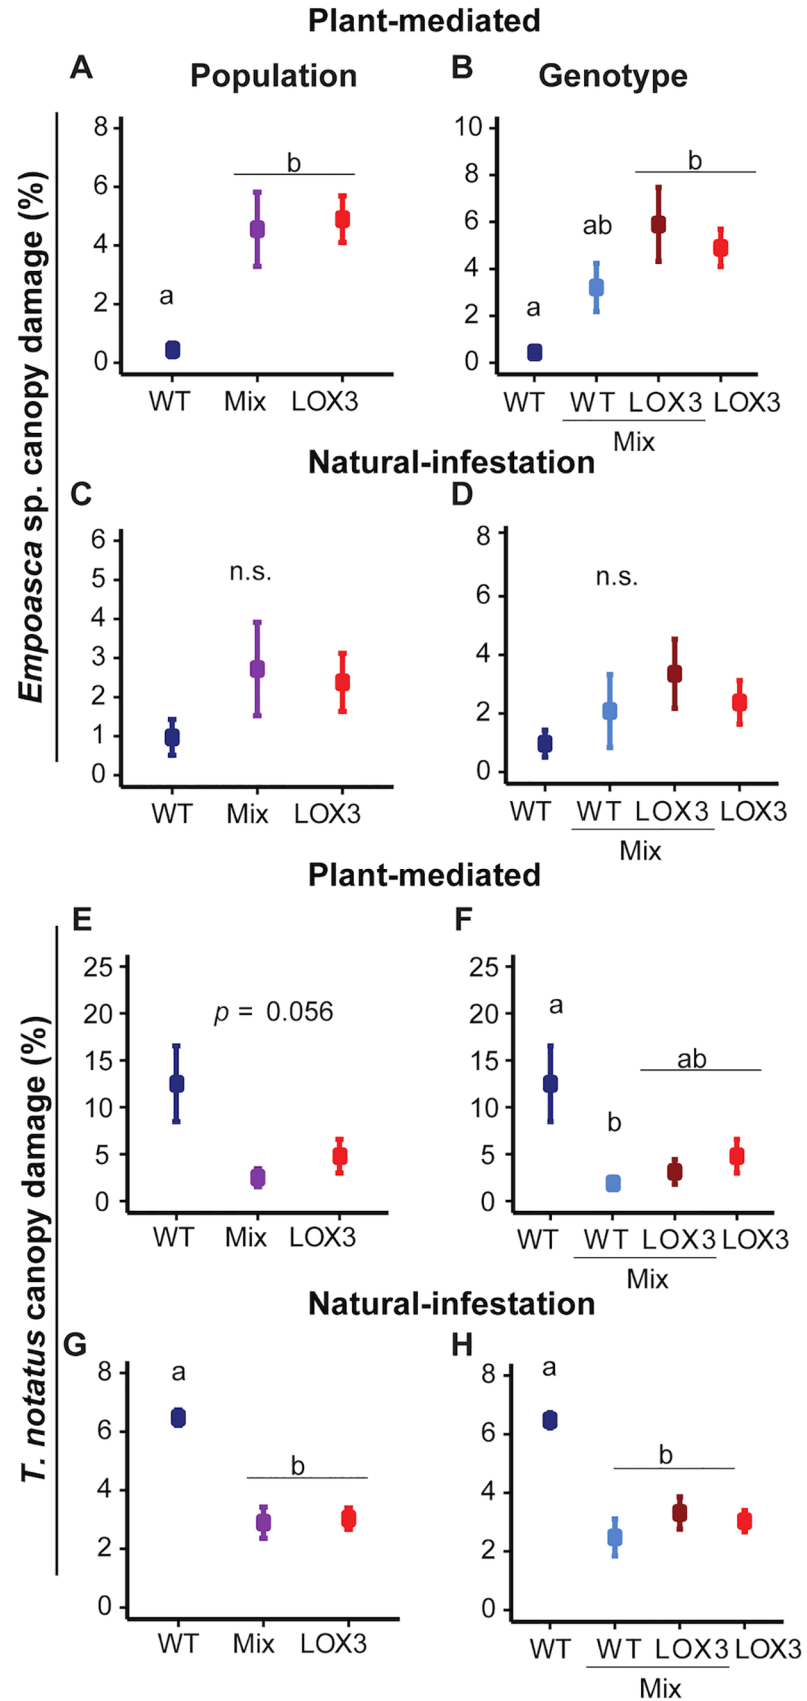

**Fig 3. *Empoasca* sp. caused more damage to asLOX3 mono- and mixtures compared to WT monocultures, determining *T. notatus* damage patterns.** Values are mean±SE. (A) In the PM Experiment, plants in WT monocultures received less *Empoasca* sp. damage than plants in mixtures and asLOX3 monocultures. (B) At the genotype level, asLOX3 plants growing either in the mixed or in the monoculture were damaged at a similar rate by *Empoasca* sp. but WT plants in the mixed culture tended to be more attacked by *Empoasca* sp. than those growing in the monoculture. (C, D) In the NI Experiment, *Empoasca* sp. damage showed similar patterns as in the PM Experiment but the damage rate did not differ significantly among populations and genotypes. (E, G) In both experiments, *T. notatus* caused more damage to plants in WT monocultures in comparison to plants in mixtures and asLOX3 monoculture. (E, F) In addition, *T. notatus* caused significantly more damage to WT plants growing in monocultures than to WT plants growing in mixtures. The amount of damaged received by asLOX3 plants did not differ when plants were growing in mixed or in monocultures. Different letters indicate statistically significant differences in Tukey HSD tests following a significant one-way ANOVA ( $P < 0.01$ ) or rank sum Dunn's tests following a significant Kruskal-Wallis test ( $P < 0.05$ ); n.s. = not significant; n = 4; one-way ANOVA ( $P = 0.056$ , A).

<https://doi.org/10.1371/journal.pone.0197221.g003>

**Table 2. Statistical summary for *T. notatus* sp. damage.**

| Herbivore            | Experiment           | Level      | Test              | Test-statistic | df   | Pairwise test | Comparison                | P            | d            |
|----------------------|----------------------|------------|-------------------|----------------|------|---------------|---------------------------|--------------|--------------|
| <i>T. notatus</i>    | PM                   | Population | ANOVA $P = 0.056$ | $F = 4.038$    | 2,9  |               |                           |              |              |
|                      |                      | Genotype   | ANOVA             | $F = 4.048$    | 3,12 | TukeyHSD      | asLOX3_mono vs asLOX3_mix | 0.991        | 0.194        |
|                      |                      |            |                   |                |      |               | asLOX3_mono vs WT_mono    | 0.162        | 1.288        |
|                      |                      |            |                   |                |      |               | asLOX3_mix vs WT_mono     | 0.102        | 1.838        |
|                      |                      |            |                   |                |      |               | asLOX3_mono vs WT_mix     | 0.725        | 0.727        |
|                      |                      |            |                   |                |      |               | WT_mix vs WT_mono         | <b>0.027</b> | <b>2.481</b> |
|                      | WT_mix vs asLOX3_mix |            |                   |                |      |               | 0.871                     | 0.789        |              |
|                      | NI                   | Population | Kruskal-Wallis    | $X^2 = 7.423$  | 2    | Dunn's-test   | asLOX3 vs Mix             | 0.845        | 0.279        |
|                      |                      |            |                   |                |      |               | asLOX3 vs WT              | <b>0.024</b> | <b>4.759</b> |
|                      |                      |            |                   |                |      |               | Mix vs WT                 | <b>0.014</b> | <b>3.588</b> |
|                      |                      | Genotype   | ANOVA             | $F = 9.676$    | 3,12 | TukeyHSD      | asLOX3_mono vs asLOX3_mix | 0.992        | 0.194        |
|                      |                      |            |                   |                |      |               | asLOX3_mono vs WT_mono    | <b>0.008</b> | <b>4.759</b> |
|                      |                      |            |                   |                |      |               | asLOX3_mix vs WT_mono     | <b>0.013</b> | <b>3.024</b> |
|                      |                      |            |                   |                |      |               | asLOX3_mono vs WT_mix     | 0.716        | 0.673        |
| WT_mix vs WT_mono    |                      |            |                   |                |      |               | <b>0.001</b>              | <b>3.586</b> |              |
| WT_mix vs asLOX3_mix | 0.556                | 0.738      |                   |                |      |               |                           |              |              |

<https://doi.org/10.1371/journal.pone.0197221.t002>

**Table 3. Statistical summary for *M. sexta* growth.**

| Parameter | Experiment           | Level      | Test/Model    | Comparison                | n | P             | d            |
|-----------|----------------------|------------|---------------|---------------------------|---|---------------|--------------|
| Weight    | PM                   | Population | LME           | asLOX3 vs Mix             | 4 | 0.305         | 0.176        |
|           |                      |            |               | asLOX3 vs WT              | 4 | <b>0.0007</b> | <b>2.517</b> |
|           |                      |            |               | Mix vs WT                 | 4 | <b>0.011</b>  | <b>2.724</b> |
|           |                      | Genotype   | LME           | asLOX3_mono vs asLOX3_mix | 4 | 0.249         | 0.732        |
|           |                      |            |               | asLOX3_mono vs WT_mono    | 4 | <b>0.016</b>  | <b>1.608</b> |
|           |                      |            |               | asLOX3_mix vs WT_mono     | 4 | <b>0.001</b>  | <b>4.482</b> |
|           |                      |            |               | asLOX3_mono vs WT_mix     | 4 | <b>0.010</b>  | <b>1.666</b> |
|           |                      |            |               | WT_mix vs WT_mono         | 4 | 0.836         | 0.190        |
|           | WT_mix vs asLOX3_mix | 4          | <b>0.0009</b> | 4.148                     |   |               |              |
|           | NI                   | Population | GLS           | asLOX3 vs Mix             | 4 | 0.231         | 1.517        |
|           |                      |            |               | asLOX3 vs WT              | 4 | <b>0.023</b>  | <b>1.485</b> |
|           |                      |            |               | Mix vs WT                 | 4 | 0.225         | 0.438        |

<https://doi.org/10.1371/journal.pone.0197221.t003>

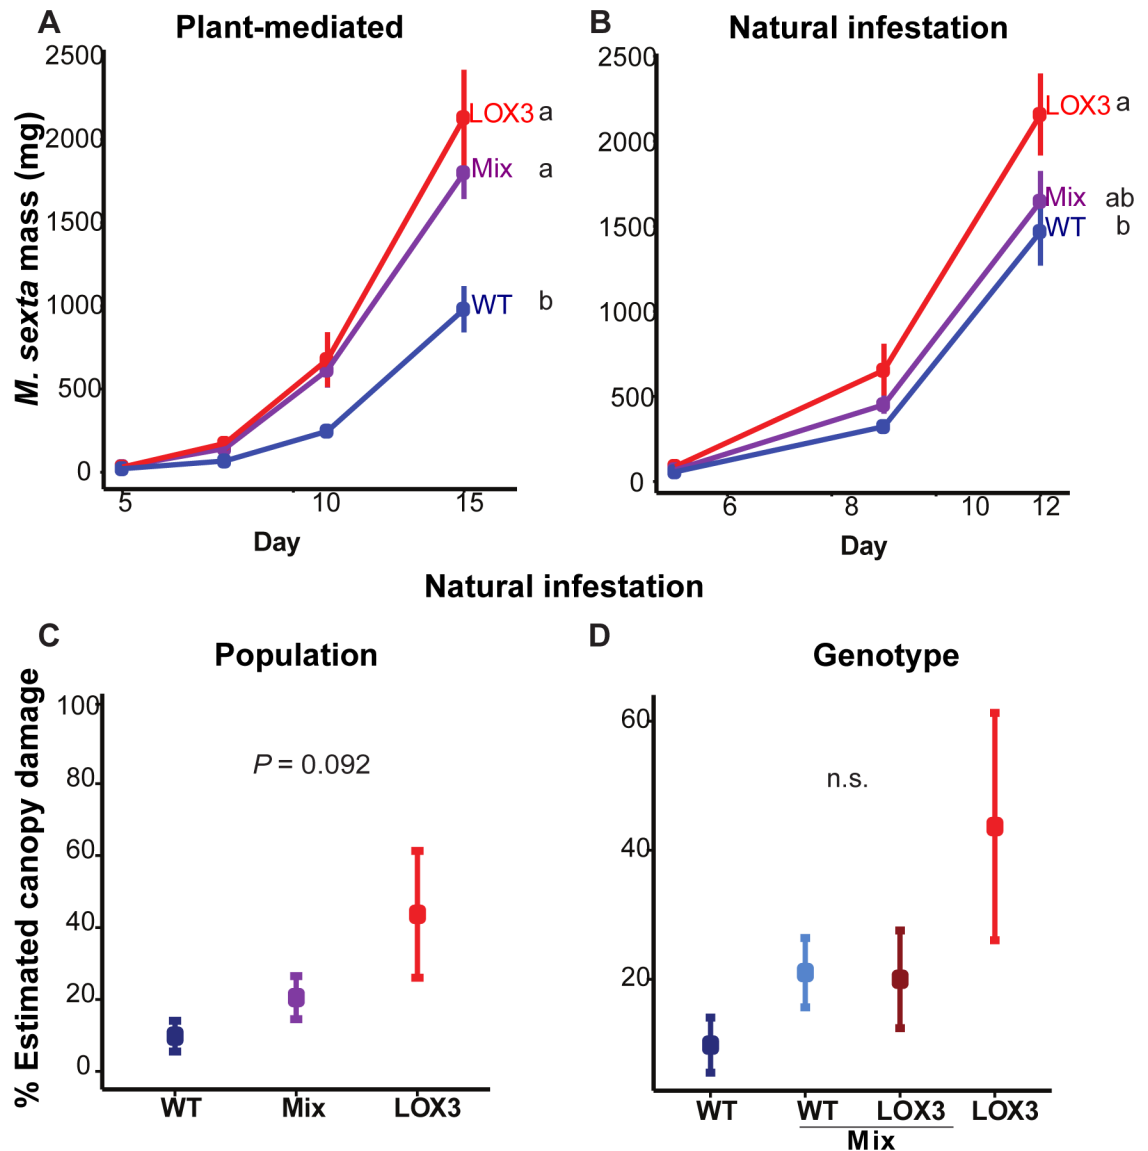

**Fig 4. *M. sexta* caterpillars grew smaller on WT monocultures and tended to consume less leaf area than on asLOX3 monocultures.** Values are mean±SE. (A) In the PM Experiment, caterpillars were larger on plants in mixtures and asLOX3 monocultures than on WT monocultures. (B) In the NI Experiment, caterpillar growth was consistent with results of the PM Experiment for WT and asLOX3. However, the growth on mixtures was intermediate. (C) Estimated consumed leaf area by caterpillar feeding on WT monocultures tended to be lower than on asLOX3 mono- and mixtures. (D) The estimated consumed leaf area did not differ between asLOX3 or WT plants growing in mixed culture when compared to the corresponding genotypes in monocultures. Different letters indicate statistically significant differences; n.s. = not significant; linear-mixed-effects-model; GLS; one-way ANOVA ( $P = 0.092$ , C).

<https://doi.org/10.1371/journal.pone.0197221.g004>

### Mixtures were more stable in terms of seed capsule production across experiments

Final rosette diameter and height did not differ by population or genotype in either experiment, nor did fresh or dry biomass (Table D in S1 File). In both experiments, flower and seed capsule number was counted throughout the reproductive period as a measure of realized reproduction and an indicator of plant Darwinian fitness.

Table 4. Statistical summary for flowers and seed capsules.

| Experiment | Parameter     | Level      | Comparison                | n | P             | d            |
|------------|---------------|------------|---------------------------|---|---------------|--------------|
| PM         | Flowers       | population | Mix vs asLOX3             | 4 | 0.175         |              |
|            |               |            | WT vs asLOX3              | 4 | 0.425         |              |
|            |               |            | WT vs Mix                 | 4 | 0.547         |              |
|            |               | genotype   | asLOX3-mono vs asLOX3-mix | 4 | 0.507         |              |
|            |               |            | asLOX3-mono vs WT-mix     | 4 | 0.129         |              |
|            |               |            | WT-mono vs asLOX3-mix     | 4 | 0.958         |              |
|            |               |            | WT-mono vs WT-mix         | 4 | 0.361         |              |
|            |               |            | asLOX3-mix vs WT-mix      | 4 | 0.469         |              |
|            | Seed capsules | population | Mix vs asLOX3             | 4 | 0.91          | 0            |
|            |               |            | WT vs asLOX3              | 4 | <b>0.0001</b> | <b>2.583</b> |
|            |               |            | WT vs Mix                 | 4 | <b>0.0002</b> | <b>1.150</b> |
|            |               | genotype   | asLOX3-mono vs asLOX3-mix | 4 | 0.856         | 0.087        |
|            |               |            | asLOX3-mono vs WT-mix     | 4 | 0.688         | 0.068        |
|            |               |            | WT-mono vs asLOX3-mix     | 4 | <b>0.001</b>  | <b>1.419</b> |
|            |               |            | WT-mono vs WT-mix         | 4 | <b>0.005</b>  | <b>0.937</b> |
|            |               |            | asLOX3-mix vs WT-mix      | 4 | 0.6224        | 0.115        |
| NI         | Flowers       | population | Mix vs asLOX3             | 4 | 0.706         |              |
|            |               |            | WT vs asLOX3              | 4 | 0.239         |              |
|            |               |            | WT vs Mix                 | 4 | 0.415         |              |
|            |               | genotype   | asLOX3-mono vs asLOX3-mix | 4 | 0.891         |              |
|            |               |            | asLOX3-mono vs WT-mix     | 4 | 0.631         |              |
|            |               |            | WT-mono vs asLOX3-mix     | 4 | 0.402         |              |
|            |               |            | WT-mono vs WT-mix         | 4 | 0.626         |              |
|            |               |            | asLOX3-mix vs WT-mix      | 4 | 0.762         |              |
|            | Seed capsules | population | Mix vs asLOX3             | 4 | <b>0.0004</b> | <b>0.910</b> |
|            |               |            | WT vs asLOX3              | 4 | <b>0.002</b>  | <b>1.053</b> |
|            |               |            | WT vs Mix                 | 4 | 0.615         | 0.007        |
|            |               | genotype   | asLOX3-mono vs asLOX3-mix | 4 | <b>0</b>      | <b>0.889</b> |
|            |               |            | asLOX3-mono vs WT-mix     | 4 | <b>0.01</b>   | <b>0.908</b> |
|            |               |            | WT-mono vs asLOX3-mix     | 4 | 0.201         | 0.164        |
|            |               |            | WT-mono vs WT-mix         | 4 | 0.741         | 0.225        |
|            |               |            | asLOX3-mix vs WT-mix      | 4 | 0.166         | 0.330        |

<https://doi.org/10.1371/journal.pone.0197221.t004>

In both experiments, the number of flowers did not differ significantly by population or by genotype, but there was a tendency for WT plants in monocultures (population and genotypic level) to produce fewer flowers than asLOX3 monocultures and mixtures in the PM Experiment (linear mixed-effects model, Table 4, Fig 5A, Fig 5B, Fig 5E, Fig 5F).

There were differences between the two experiments regarding numbers of seed capsules. In the PM Experiment, when initial caterpillar density was not reduced and caterpillars were allowed to move among populations (Fig 1C), WT monocultures produced fewer seed capsules than other cultures, while mixtures and asLOX3 monocultures did not differ significantly from each other (linear mixed-effects model, Table 4, Fig 5C). While WT plants in monocultures produced fewer seed capsules compared to both genotypes in mixture and asLOX3 plants in monocultures, the number of seed capsules did not differ for asLOX3 plants in monocultures from both genotypes in mixtures, or between genotypes within mixtures (linear mixed-effects model, Table 4, Fig 5D).

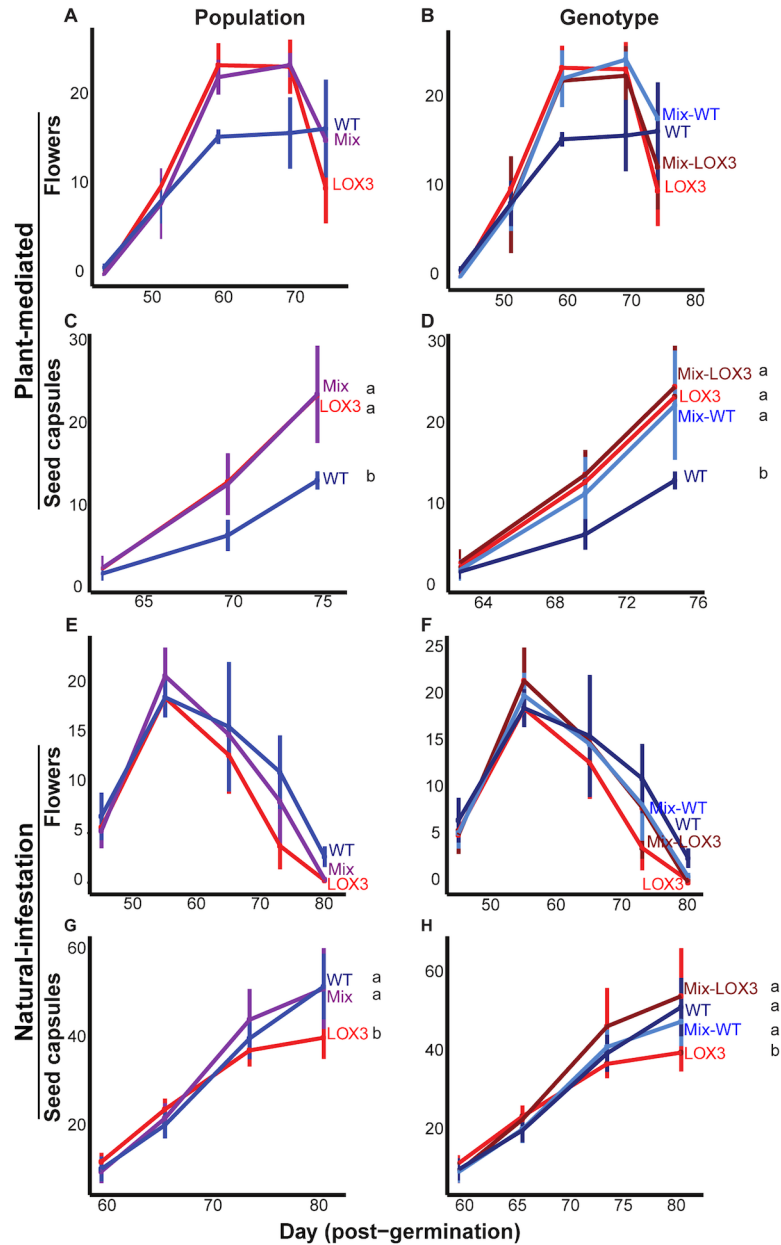

**Fig 5. Mixtures were more stable in terms of seed capsule production across experiments and number of flowers did not differ between populations.** Values are mean±SE. (A) At higher caterpillar densities (PM Experiment), WT monocultures tended to produce fewer flowers than other population types. (B) WT growing in the mixed culture tended to have more flowers than those growing in monocultures, while the number of flowers produced by *asLOX3* plants growing either in mono- or mixtures did not differ. (C) WT monocultures produced fewer seed capsules than *asLOX3* mono- and mixtures when caterpillar density was high. (D) At the genotype level, WT plants growing in monocultures produced fewer seed capsules than those growing in mixtures, while the number of seed capsules did not differ between *asLOX3* plants when growing in mono- or in mixtures. (E, F) When the caterpillar density was reduced and later all caterpillars were removed from the mesocosm (NI Experiment), the number of flowers did not differ between populations or genotypes. (G) *asLOX3* monocultures produced fewer seed capsules than mixed and WT monocultures. (H) At the genotype level, *asLOX3* plants growing in the monoculture had fewer seed capsules than those growing in the mixed culture while the number of seed capsules did not differ between WT plants growing in monoculture or mixed culture. Different letters indicate significant differences; n = 4; linear mixed-effects models; see Table 4 for complete analysis.

<https://doi.org/10.1371/journal.pone.0197221.g005>

In the NI Experiment, when caterpillar density was reduced to mimic dispersal once larvae started to move among plants (Fig 1C), asLOX3 monocultures produced fewer seed capsules than mixed and WT monocultures, while the number of seed capsules did not differ between mixed and WT monocultures (linear mixed-effects model, Table 3, Fig 5G). asLOX3 plants in monocultures had fewer seed capsules than both genotypes in mixtures (linear mixed-effects model, Table 4, Fig 5H). The number of seed capsules did not differ between WT in monocultures and both genotypes in mixtures, or between genotypes within mixtures (linear mixed-effects model, Table 4, Fig 5H).

In summary, the number of flowers did not differ significantly by population or genotype in either experiment, and neither did plant size, but seed capsule number did. Mixtures showed stability in seed capsule production by having more consistent production compared to the two monocultures across experiments. Specifically, mixtures outcompeted WT monocultures under high caterpillar density (PM Experiment) and asLOX3 monocultures under low caterpillar density (NI Experiment).

## Discussion

Plant genetic diversity can have cascading effects in ecological communities, but the mechanisms driving these effects remain largely unexplored. We manipulated a single key defense gene in experimental populations of *N. attenuata* which codes for a lipoxygenase enzyme providing substrate for the jasmonate (JA) plant defense hormones [31], and measured the resulting effects for herbivore communities and plant fitness correlates in a controlled, semi-natural setting (Fig 1). We chose to manipulate a key gene in JA biosynthesis because JA regulates many defense traits against herbivores, and variation in JA signaling and accumulation has been shown to alter herbivore community composition in wild *N. attenuata* populations [20,25]. Furthermore, JA signaling limits plant competitive growth and is an important regulator of potential trade-offs between plant growth and defense [41–43].

We exposed plant populations differing only in frequency of JA-deficient asLOX3 genotypes (0%, 50% or 100%) to attack by three common native herbivores: *Empoasca* sp., *T. notatus* and *M. sexta* larvae, for which binary interactions are well characterized [20,21,26,27,32], providing the required mechanistic foundation for the community-level questions we ask in this study. We used two similar experimental designs, one which allowed observation of primarily plant-mediated effects (PM), and one which more accurately mimicked natural infestation (NI).

### WT plants in mixed culture were more heavily attacked by *Empoasca* sp.

*Empoasca* sp. is an opportunistic herbivore that mainly attacks plants in nature having lower JA production than their neighbors, and preferentially attacks asLOX3 plants and other JA-deficient transgenic lines in experimental plantations [20,21]. Indeed, asLOX3 monocultures were more damaged by *Empoasca* sp. than WT monocultures in the PM Experiment, and the same trend was apparent in the NI Experiment (Fig 3). Interestingly, mixtures comprising alternating WT and asLOX3 plants in equal numbers were more damaged by *Empoasca* sp. than were WT monocultures, and damage rates did not differ between mixtures and asLOX3 monocultures. This is because WT plants growing in the mixtures tended to be more damaged by *Empoasca* sp. than those growing in the monocultures. In addition, damage to WT plants growing in the mixtures was similar to that on neighboring asLOX3 plants (Fig 3). The relatively high damage rate of *Empoasca* sp. on its uncommon host, WT, might have resulted from *Empoasca* sp. individuals moving between the two genotypes due to their close proximity in mixtures (Fig 1B), which reflects spatial distribution of *N. attenuata* plants clustered in native

populations [6]. To detect JA-deficient plants, *Empoasca* sp. employs probing behavior with their stylets on the plants [20]. Therefore, when *Empoasca* sp. searches and probes new feeding leaves, the chance to feed on WT plants in the mixed culture due to the vicinity to neighboring asLOX3 plants is high. Switching between asLOX3 and WT in the mixtures probably results in the increased damage on the WT plants. It is likely that the presence of asLOX3 plants in mixed population increases *Empoasca* sp. residence in this patch compared to WT monocultures. The effect size may depend on the density and frequency of asLOX3 plants and neither factor was varied in this study. However, it is known that neighboring plants in mixed patches can influence interactions between focal plants and their herbivores, leading to associational resistance or associational susceptibility [44]. This depends on multiple factors, including the diversity of neighboring plants, herbivore movement and trait or plant density and frequency [45,46]. To investigate whether the higher damage rates of *Empoasca* sp. on WT plants in mixed populations are due to associational effects would require experiments that independently manipulate plant density, and frequency of JA-deficient plants.

Furthermore, in our study, we investigated the effect of manipulating a key plant trait on two herbivore traits, damage and growth. Consumer traits are a key component to understand the emergent pattern when manipulating plant diversity [47], especially traits related to feeding and movement behavior [9,48]. For example, mixing plant genotypes can reduce the efficiency of herbivore feeding. This was shown in a previous study, where the consumption by Japanese beetles (*Popillia japonica*) was reduced in genotypic mixtures of the common evening primrose (*Oenothera biennis*) compared to beetles feeding on plants of same genotype [49]. Although some studies showed that herbivore abundance might increase in response to increasing diversity, if the feeding efficiency is affected, the damage might not be positively correlated to an increase in herbivore abundance. Therefore, additional experiments focusing on herbivore traits in genetic mixtures vs monocultures are required to investigate *Empoasca* sp. feeding behaviors in these cultures. Monitoring movement and residence time on plant genotypes in small-scale experiments could reveal the pattern of host selection in mixed plant populations.

### ***Empoasca* sp. infestation determined *T. notatus* damage**

Interestingly, WT plants in mixtures received less damage from *T. notatus* than WT plants in monocultures, while asLOX3 plants were attacked at a similar rate whether growing in monocultures or mixtures. *T. notatus* is a specialist herbivore that often colonizes *N. attenuata* plants in nature. *T. notatus* damage as well as many life history parameters are not affected by manipulating JA levels in host plants [27,30] although *N. attenuata* plants deficient in JA-regulated 17-hydroxygeranylinalool diterpene glycosides (HGL-DTGs) receive more damage from *T. notatus* [50]. However, *N. attenuata* plants infested by *Empoasca* sp. receive less damage from *T. notatus* under natural conditions [30]. We found that under glasshouse conditions and in simplified experimental designs, plants co-infested with *Empoasca* sp. also received less damage by *T. notatus* (Fig 2A). Furthermore, both herbivores showed contrasting feeding preference within the plant: *Empoasca* sp. preferred older leaves, while *T. notatus* attacked younger leaves (Fig 2B). Finally, we can conclude that *Empoasca* sp. infestation rather than JA variation *per se* likely determined *T. notatus* damage patterns on *N. attenuata* plants [30].

A limited number of studies have addressed the effect of plant diversity on altering the interaction between herbivore species [9]. For example, plant-mediated indirect effects can alter herbivore interactions, such as colonization processes. While the specialist *T. notatus* can colonize both genotypes, in nature, *T. notatus* might simply disperse to colonize *Empoasca* sp.-free plants. Although colonization processes and herbivore movement are important factors,



other subtle changes can also occur in response to variation in plant traits. For example, it was previously reported that co-infestation with *Empoasca* sp. shifts the female-biased sex ratio of *T. notatus* towards a higher proportion of male progeny, and this sex ratio shift can be attributed to changes in cytokinin-regulated plant traits such as nutrient quality that may be linked to *Empoasca* sp. co-infestation [27]. This could provide a mechanistic explanation as to why *T. notatus* avoids *Empoasca* sp.-damaged plants.

### ***M. sexta* larval growth depended on larval density in mixtures**

*M. sexta* larvae grew larger on asLOX3 monocultures in comparison to WT monocultures in both experiments. This is consistent with previous literature that reported increased susceptibility of LOX3-silenced plants to attack by *M. sexta* larvae [31,51,52] and was independent of prior *T. notatus* damage. This is in contrast to work by Kessler and Baldwin [26] indicating that *T. notatus*-damaged *N. attenuata* plants are poor hosts for *M. sexta*, but part of the effect observed in that study was due to activity of native *Geocoris* spp. predators not present in the mesocosm experiments. Furthermore, in our study, all plants were damaged by *T. notatus*, and it is possible that the ca. 2-fold difference in percent canopy damage we observed did not result in differences in *M. sexta* growth. JA-deficient asLOX3 plants accumulate less nicotine and trypsin protease inhibitors (TPI) as well as many other defensive metabolites in comparison to WT plants, and the reduced levels of these important direct defenses results in lower resistance to attack by *M. sexta* larvae [31,50,52].

However, mixtures showed different results under high or low caterpillar density. In the PM Experiment, caterpillar density was not reduced once larvae became mobile among plants of the same population, and caterpillar growth on mixtures was similar to that on asLOX3 monocultures. This is likely explained by the movement of caterpillars among genotypes in mixtures. For example, caterpillars that first fed on asLOX3 grew larger than those on WT plants and therefore, when they moved to a WT neighboring plant, likely removed more leaf area than the smaller caterpillars which had fed initially on WT. In the NI Experiment, we reduced caterpillar density once larvae became mobile among plants to mimic natural dispersal and predation, and growth on mixtures was found to be intermediate between that observed on WT and asLOX3 monocultures. In addition, the damage caused by caterpillars to mixtures also tended to be intermediate. In both experiments, initial caterpillar growth depended on plant genotype identity rather than on whether the particular genotype was growing in mono- or mixed culture.

### **Seed capsule production was more stable in mixtures**

We counted flower number and seed capsule production as estimates of plant fitness [6,23]. Seed capsule production was lower for WT monocultures than asLOX3 monocultures and mixtures when caterpillar density was high, and flower production showed the same tendency (PM Experiment). In the PM Experiment, caterpillars that fed on asLOX3 monocultures and mixtures moved to WT monocultures once they had stripped the asLOX3 plants of much of their foliage, and these WT monocultures were still coping with their own caterpillars. Under these conditions, WT plants in monocultures had to cope with the attack of multiple 4<sup>th</sup> or 5<sup>th</sup> instar caterpillars which removed a substantial portion of shoot biomass within a short time, leading to reduced seed production. WT plants in mixtures tended to produce more flowers and seed capsules than WT plants in monocultures. This may have been in response to increased competitive ability of asLOX3 plants [33] and dilution of caterpillar attack, which was initially divided between the two genotypes. When caterpillar density was reduced to mimic dispersal out of the mesocosm (NI Experiment), the number of flowers did not differ

by population type or genotype, but as*LOX3* monocultures produced fewer seed capsules than WT mono- and mixtures. In this experimental design, caterpillars were prevented from moving among populations by reducing their density and later removing them from the experiment. Therefore, WT plants in monocultures were exposed to fewer caterpillars in comparison to PM Experiment, mimicking a moderate attack scenario more commonly seen in nature. In addition, reducing caterpillar density and finally removing caterpillars from the experiment allowed WT plants to recover and produce more seed capsules in comparison to as*LOX3* monocultures, which tended to have more damage. The mixed culture probably had the advantage again of having caterpillars distributed among both genotypes, one of which is more susceptible but a better competitor.

JA induction plays an important role in mediating plant defense and associated fitness costs under herbivore attack [41,53–55]. The production of many JA-regulated specialized metabolites commands resources and signaling capacity that could be otherwise invested in reproduction, but has the fitness benefit of increasing plant resistance to herbivory [15,38,56–58] and consequently, the fitness of herbivores is negatively affected [55]. *M. sexta* attack results in immediate growth reduction of *N. attenuata* plants upon endogenous JA induction [59,60] as does treatment with methyl jasmonate (MJ) that results in slower growth of induced plants growing in competition with uninduced plants in the glasshouse [41] and in nature [42]. A combination of JA-regulated reconfiguration of general metabolism, induction of specialized metabolites that affect *M. sexta* larval growth [21,50,59,61,62], and different competitive ability among the genotypes account for the outcomes in both experiments: there were large differences in *M. sexta* damage but only small differences in patterns of *Empoasca* sp. and *T. notatus* damage between experiments. Mixtures outcompeted either WT or as*LOX3* under different herbivory regimes, as seed capsule production in WT and as*LOX3* monocultures showed stronger fluctuation across the two experiments. The fact that mixtures were not outcompeted by both monocultures under different herbivory regimes can be interpreted as form of stability. When herbivore intensity varies throughout and between seasons, having a consistent performance compared to other populations may ensure sufficient representation of seeds over multiple generations in seedbanks and in the next growing season. Thus the Darwinian fitness of different genotypes may depend on their frequency in populations or patches. In summary, plant competitive ability versus resistance to attack, as well as diluted attack due to the mixing of two genotypes, could account for the seed capsule production in the mixed culture under different herbivory regimes.

The diversity-stability hypothesis predicts that biodiversity increases stability of ecosystem processes against perturbations, but in some cases opposite effects were detected [63,64]. A large body of literature has theoretically or experimentally investigated effects of diversity on different kinds of stability, most prominently temporal stability, resistance and resilience (recovery) due to diversity as measured by species richness, functional traits, functional groups or genotypes in communities [65–70]. Previous studies have helped to refocus the biodiversity-ecosystem function debate and highlighted the consequences for ecosystem function triggered by altering levels of biodiversity, especially under perturbation regimes or changing environments. However, the results of manipulating biodiversity were often explained by abstract concepts rather than measurable mechanisms, and these concepts were not always experimentally demonstrated. For example, at least some species or individuals with particular functional traits will show differences in response to perturbations in diverse communities [71]. It has been proposed that stability might result from reducing competition [64] or from facilitation in diverse communities [72]. However most of these studies have not measured competition or facilitation. When species-level or uncharacterized genetic biodiversity is manipulated, many unknown factors or traits that are associated with the studied trait may contribute to observed effects. In contrast, manipulating functional diversity by altering a single key gene increases mechanistic resolution,

providing more predictive power. In our study, stability in plant reproductive output measured as more consistent performance in mixtures resulted from the differences of genotype performance when growing in mono- or mixtures under different levels of herbivore attack. This is correlated to both the plant's competitive ability and susceptibility to herbivores, which are regulated by varying JA production via *LOX3* expression.

Variation in plant defense traits can strongly affect interactions and performance of herbivore populations. Also, variability in plant nutrient levels is essential part of this interaction. A previous meta-analysis showed that variability in nutrient levels could suppress herbivore populations [73]. However, it is challenging to separate the contribution of plant nutritive versus defensive traits. Key gene might be a valuable tool to separately manipulate nutritive and defensive traits to test their relevance.

## Summary and outlook

Our data shows that variation in plant defense traits can directly affect host selection and herbivore performance in mixed populations. We also show that other indirect consequences of varying plant genotype, for example increased damage from one herbivore species in the community, can alter damage rates of another herbivore species. Furthermore, we found seed capsule output in mixtures was more stable under high or low density of *M. sexta* caterpillars. Susceptibility to herbivores and plant competitive ability are oppositely mediated by JA-regulated traits. These data indicate the usefulness of a key gene approach to link variation in plant defense traits to herbivore interactions and the consequences for plant populations in community-level study. Future studies could profit from such approach to test specific predictions about the consequences of varying specific traits.

Moving the field of ecological research towards a more predictive science is essential to cope with environmental change scenarios [74]. Investigating functional traits controlled by known key genes is an approach that might help in predicting interaction patterns in ecological communities, and generating communities with predictable responses to perturbation. This perspective is also relevant in applied ecology and agricultural systems. Genetically diverse crop systems rely on traditional varieties often used in small scale farms [75] which deliver multiple benefits such as increased yield stability, productivity, reduced pest load and improved soil fertility [76]. In contrast, industrial agriculture relies heavily on monocultures, which, for example, minimize differences in harvesting time that result from combining multiple cultivars. A key genes approach could provide a tool for large scale agriculture to develop functionally more diverse crops while avoiding unwanted variation, hopefully limiting the tradeoff between preserving biodiversity and satisfying rapidly increasing food demands.

This approach does require that organisms are genetically characterized or closely related to characterized organisms. Also, it relies on previous knowledge of gene function or biosynthetic pathways and therefore, uncharacterized key genes are of little value for this approach [77]. However, natural variation in phenotypes with heritable genetic bases that support communities might be targeted and tested in controlled experimental designs. Genome editing and cheap genome sequencing will facilitate gene manipulation in a growing number of organisms. Finally, future research might focus on the role of key genes in natural environments [55] to reveal insights into emergent properties resulting from the interaction of diverse plant populations with multiple biotic and abiotic stresses.

## Supporting information

**S1 File. Damage of *Empoasca* sp. and *Tupiocoris notatus*; data to show that *Manduca sexta* caterpillar growth was reduced on WT in comparison to as*LOX3* plants; soil layers, soil**

**components, and fertilization parameters in the mesocosm; and measures of different plant growth parameters.**

(PDF)

**S2 File. Soil moisture and temperature measurement in the mesocosm.**

(ZIP)

## Acknowledgments

We thank the glasshouse team and technical services at the Max Planck Institute for Chemical Ecology for helping with soil preparation, plant growth, mesocosm installation and overall support. We also thank technical staff at the department of Molecular Ecology for providing seeds of the transgenic lines and caring for insect colonies. We specially thank P. Backmann, N. Boehme and C. Loeser for their overall support in the mesocosm at our glasshouse facility in Isserstedt and G. Kunert for advice on statistical analyses. We thank the many members of our department who helped with the experimental preparation in the mesocosm. We thank both the International Max Planck Research School [IMPRS] on the Exploration of Ecological Interactions with Chemical and Molecular Techniques and the Young Biodiversity Research Training Group–yDiv.

## Author Contributions

**Conceptualization:** Nora Adam, Stefan Meldau, Ian T. Baldwin, Meredith C. Schuman.

**Data curation:** Nora Adam, Meredith C. Schuman.

**Formal analysis:** Nora Adam.

**Funding acquisition:** Ian T. Baldwin.

**Investigation:** Nora Adam.

**Methodology:** Nora Adam, Mario Kallenbach, Stefan Meldau, Daniel Veit, Nicole M. van Dam, Ian T. Baldwin, Meredith C. Schuman.

**Resources:** Stefan Meldau, Daniel Veit, Ian T. Baldwin.

**Supervision:** Mario Kallenbach, Stefan Meldau, Nicole M. van Dam, Ian T. Baldwin, Meredith C. Schuman.

**Visualization:** Nora Adam.

**Writing – original draft:** Nora Adam.

**Writing – review & editing:** Ian T. Baldwin, Meredith C. Schuman.

## References

1. Fisher RA. The genetical theory of natural selection. Oxford, UK: Clarendon Press; 1930.
2. Madritch MD, Hunter MD. Intraspecific litter diversity and nitrogen deposition affect nutrient dynamics and soil respiration. *Oecologia*. 2003; 136: 124–128. <https://doi.org/10.1007/s00442-003-1253-0> PMID: 12684853
3. Hughes AR, Inouye BD, Johnson MTJ, Underwood N, Vellend M. Ecological consequences of genetic diversity. *Ecol Lett*. 2008; 11: 609–623. <https://doi.org/10.1111/j.1461-0248.2008.01179.x> PMID: 18400018
4. Hughes AR, Stachowicz JJ. Genetic diversity enhances the resistance of a seagrass ecosystem to disturbance. *Proc Natl Acad Sci U S A*. 2004; 101: 8998–9002. <https://doi.org/10.1073/pnas.0402642101> PMID: 15184681

5. Crutsinger GM, Collins MD, Fordyce J a, Gompert Z, Nice CC, Sanders NJ. Plant genotypic diversity predicts community structure and governs an ecosystem process. *Science*. 2006; 313: 966–968. <https://doi.org/10.1126/science.1128326> PMID: 16917062
6. Schuman MC, Allmann S, Baldwin IT. Plant defense phenotypes determine the consequences of volatile emission for individuals and neighbors. *eLife*. 2015; 4: e04490. <https://doi.org/10.7554/eLife.04490> PMID: 25873033
7. Rudman SM, Rodriguez-Cabal MA, Stier A, Sato T, Heavyside J, Rana W, et al. Adaptive genetic variation mediates bottom-up and top-down control in an aquatic ecosystem. *Proc Biol Sci*. 2015; 282: 20151234. <https://doi.org/10.1098/rspb.2015.1234> PMID: 26203004
8. Johnson MTJ, Stinchcombe JR. An emerging synthesis between community ecology and evolutionary biology. *Trends Ecol Evol*. 2007; 22: 250–257. <https://doi.org/10.1016/j.tree.2007.01.014> PMID: 17296244
9. Moreira X, Abdala-roberts L, Rasmann S, Castagneyrol B, Mooney KA. Plant diversity effects on insect herbivores and their natural enemies: Current thinking, recent findings, and future directions. *Curr Opin Insect Sci*. 2015; 14:1–7. <https://doi.org/10.1016/j.cois.2015.10.003> PMID: 27436639
10. Mitton JB. The union of ecology and evolution: Extended phenotypes and community genetics. *Bioscience*. 2003; 53: 208–209. [https://doi.org/10.1641/0006-3568\(2003\)053\[0208:TUOEAE\]2.0.CO;2](https://doi.org/10.1641/0006-3568(2003)053[0208:TUOEAE]2.0.CO;2)
11. Johnson MTJ, Stinchcombe JR. An emerging synthesis between community ecology and evolutionary biology. *Trends Ecol Evol*. 2007; 22: 250–257. <https://doi.org/10.1016/j.tree.2007.01.014> PMID: 17296244
12. Pachepsky E, Bown JL, Eberst A, Bausenwein U, Millard P, Squire GR, et al. Consequences of intra-specific variation for the structure and function of ecological communities Part 2: Linking diversity and function. *Ecol Modell*. 2007; 207: 277–285. <https://doi.org/10.1016/j.ecolmodel.2007.05.005>
13. Crutsinger GM. A community genetics perspective: opportunities for the coming decade. *New Phytol*. 2015; 210: 65–70. <https://doi.org/10.1111/nph.13537> PMID: 26171846
14. Whitham TG, Bailey JK, Schweitzer JA, Shuster SM, Bangert RK, LeRoy CJ, et al. A framework for community and ecosystem genetics: from genes to ecosystems. *Nat Rev Genet*. 2006; 7: 510–523. <https://doi.org/10.1038/nrg1877> PMID: 16778835
15. Steppuhn A, Gase K, Krock B, Halitschke R, Baldwin IT. Nicotine's defensive function in nature. *PLoS Biol*. 2004; 2: e217. <https://doi.org/10.1371/journal.pbio.0020217> PMID: 15314646
16. Kessler D, Gase K, Baldwin IT. Field experiments with transformed plants reveal the sense of floral scents. *Science*. 2008; 321: 1200–1202. <https://doi.org/10.1126/science.1160072> PMID: 18755975
17. Kumar P, Pandit SS, Steppuhn A, Baldwin IT. Correction for Kumar et al., Natural history-driven, plant-mediated *RNAi*-based study reveals *CYP6B46*'s role in a nicotine-mediated antipredator herbivore defense. *Proc Natl Acad Sci U S A*. 2016; 113: E1328–E1328. <https://doi.org/10.1073/pnas.1600609113> PMID: 26884204
18. Kumar P, Rathi P, Schoettner M, Baldwin IT, Pandit S. Differences in nicotine metabolism of two *Nicotiana attenuata* herbivores render them differentially susceptible to a common native predator. *PLoS One*. 2014; 9: 1–10. <https://doi.org/10.1371/journal.pone.0095982> PMID: 24755743
19. Schuman MC, Heinzel N, Gaquerel E, Svatos A, Baldwin IT. Polymorphism in jasmonate signaling partially accounts for the variety of volatiles produced by *Nicotiana attenuata* plants in a native population. *New Phytol*. 2009; 183: 1134–1148. <https://doi.org/10.1111/j.1469-8137.2009.02894.x> PMID: 19538549
20. Kallenbach M, Bonaventure G, Gilardoni PA, Wissgott A, Baldwin IT. *Empoasca* leafhoppers attack wild tobacco plants in a jasmonate-dependent manner and identify jasmonate mutants in natural populations. *Proc Natl Acad Sci U S A*. 2012; 109: E1548–E1557. <https://doi.org/10.1073/pnas.1200363109> PMID: 22615404
21. Kessler A, Halitschke R, Baldwin IT. Silencing the jasmonate cascade: induced plant defenses and insect populations. *Science*. 2004; 305: 665–668. <https://doi.org/10.1126/science.1096931> PMID: 15232071
22. Van Dam NM, Hare JD. Differences in distribution and performance of two sap-sucking herbivores on glandular and non-glandular *Datura wrightii*. *Ecol Entomol*. 1998; 23:22–32. <https://doi.org/10.1046/j.1365-2311.1998.00110.x>
23. Glawe GA, Zavala JA, Kessler A, Van Dam NM, Baldwin IT. Ecological costs and benefits correlated with trypsin protease inhibitor production in *Nicotiana attenuata*. *Ecology*. 2003; 84: 79–90. [https://doi.org/10.1890/0012-9658\(2003\)084\[0079:ECABCW\]2.0.CO;2](https://doi.org/10.1890/0012-9658(2003)084[0079:ECABCW]2.0.CO;2)
24. Gassmann AJ, Hare JD. Indirect Cost of a Defensive Trait: Variation in Trichome Type Affects the Natural Enemies of Herbivorous Insects on *Datura wrightii*. *Oecologia*. 2005; 144:62–71. <https://doi.org/10.1007/s00442-005-0038-z> PMID: 15800744

25. Kessler A, Baldwin IT. Defensive function of herbivore-induced plant volatile emissions in nature. *Science*. 2001; 291: 2141–2144. <https://doi.org/10.1126/science.291.5511.2141> PMID: 11251117
26. Kessler A, Baldwin IT. Herbivore-induced plant vaccination. Part I. The orchestration of plant defenses in nature and their fitness consequences in the wild tobacco *Nicotiana attenuata*. *Plant J*. 2004; 38: 639–649. <https://doi.org/10.1111/j.1365-313X.2004.02076.x> PMID: 15125770
27. Adam N, Erler T, Kallenbach M, Kaltenpoth M, Kunert G, Baldwin IT, et al. Sex ratio of mirid populations shifts in response to hostplant co-infestation or altered cytokinin signaling. *J Integr Plant Biol*. 2017; 59: 44–59. <https://doi.org/10.1111/jipb.12507> PMID: 27862998
28. Joo Y, Yon F, Schuman MC, Kim JKGS, Brütting C, Baldwin IT. Induced volatile blends with both “fast” and “slow” components provide robust indirect defence in nature. *Functional Ecology*. 2018; 32:136–149. <https://doi.org/10.1111/1365-2435.12947>
29. Roda AL, Oldham NJ, Svatos A, Baldwin IT. Allometric analysis of the induced flavonols on the leaf surface of wild tobacco (*Nicotiana attenuata*). *Phytochemistry*. 2003; 62: 527–536. [https://doi.org/10.1016/S0031-9422\(02\)00608-8](https://doi.org/10.1016/S0031-9422(02)00608-8) PMID: 12620365
30. Fragoso V, Rothe E, Baldwin IT, Kim SG. Root jasmonic acid synthesis and perception regulate folivore-induced shoot metabolites and increase *Nicotiana attenuata* resistance. *New Phytol*. 2014; 202: 1335–1345. <https://doi.org/10.1111/nph.12747> PMID: 24580101
31. Halitschke R, Baldwin IT. Antisense *LOX* expression increases herbivore performance by decreasing defense responses and inhibiting growth-related transcriptional reorganization in *Nicotiana attenuata*. *Plant J*. 2003; 36: 794–807. <https://doi.org/10.1046/j.1365-313X.2003.01921.x> PMID: 14675445
32. Meldau S, Wu J, Baldwin IT. Silencing two herbivory-activated *MAP* kinases, *SIPK* and *WIPK*, does not increase *Nicotiana attenuata*'s susceptibility to herbivores in the glasshouse and in nature. *New Phytol*. 2009; 181: 161–173. <https://doi.org/10.1111/j.1469-8137.2008.02645.x> PMID: 19076722
33. Meldau S, Ullman-Zeunert L, Govind G, Bartram S, Baldwin IT. *MAPK*-dependent *JA* and *SA* signalling in *Nicotiana attenuata* affects plant growth and fitness during competition with conspecifics. *BMC Plant Biol*. 2012; 12: 213. <https://doi.org/10.1186/1471-2229-12-213> PMID: 23148462
34. Schoener TW. Field experiments on interspecific competition. *Am Nat*. 1983; 122: 240–285.
35. Stork WFJ, Weinhold A, Baldwin IT. Trichomes as dangerous lollipops: Do lizards also use caterpillar body and frass odor to optimize their foraging? *Plant Signal Behav*. 2011; 6: 1893–1896. <https://doi.org/10.4161/psb.6.12.18028> PMID: 22095147
36. Krügel T, Lim M, Gase K, Halitschke R, Baldwin IT. Agrobacterium-mediated transformation of *Nicotiana attenuata*, a model ecological expression system. *Chemoecology*. 2002; 12: 177–183. <https://doi.org/10.1007/PL00012666>
37. Herden J, Meldau S, Kim S-G, Kunert G, Joo Y, Baldwin IT, et al. Shifting *Nicotiana attenuata*'s diurnal rhythm does not alter its resistance to the specialist herbivore *Manduca sexta*. *J Integr Plant Biol*. 2016; 58: 656–668. <https://doi.org/10.1111/jipb.12458> PMID: 26699809
38. Steppuhn A, Schuman MC, Baldwin IT. Silencing jasmonate signalling and jasmonate-mediated defences reveals different survival strategies between two *Nicotiana attenuata* accessions. *Mol Ecol*. 2008; 17: 3717–3732. <https://doi.org/10.1111/j.1365-294X.2008.03862.x> PMID: 18662222
39. R Development Core Team. R: A language and environment for statistical computing. R Foundation for Statistical Computing, Vienna, Austria; 2015.
40. Jose Pinheiro, Bates D, DebRoy S, Sarkar D, the RDC Team. nlme: Linear and Nonlinear Mixed Effects Models. R Package version 3.1–11; 2013
41. van Dam NM, Baldwin IT. Costs of jasmonate-induced responses in plants competing for limited resources. *Ecol Lett*. 1998; 1: 30–33. <https://doi.org/10.1046/j.1461-0248.1998.00010.x>
42. Baldwin IT. Jasmonate-induced responses are costly but benefit plants under attack in native populations. *Proc Natl Acad Sci U S A*. 1998; 95: 8113–8118. PMID: 9653149
43. Campos ML, Yoshida Y, Major IT, de Oliveira Ferreira D, Weraduwege SM, Froehlich JE, et al. Rewiring of jasmonate and phytochrome B signalling uncouples plant growth-defense tradeoffs. *Nat Commun*. 2016; 7: 12570. <https://doi.org/10.1038/ncomms12570> PMID: 27573094
44. Hambäck PA, Inouye BD, Andersson P, Underwood N. Effects of plant neighborhoods on plant-herbivore interactions: Resource dilution and associational effects. *Ecology*. 2014; 95: 1370–1383. <https://doi.org/10.1890/13-0793.1> PMID: 25000768
45. Underwood N, Inouye BD, Hambäck PA. A Conceptual Framework for Associational Effects: When do neighbors matter and how would we know? *Q Rev Biol*. 2014; 89: 1–19. PMID: 24672901
46. Kim TN, Underwood N. Plant neighborhood effects on herbivory: damage is both density and frequency dependent. *Ecology*. 2015; 96: 1431–1437. <https://doi.org/10.1890/14-1097.1> PMID: 26236855

47. Abdala-Roberts L, Mooney KA. Ecological and evolutionary consequences of plant genotype diversity in a tri-trophic system. *Ecology*. 2014; 95: 2879–2893. <https://doi.org/10.1890/13-2029.1>
48. Abdala-roberts L, Terán JCB, Moreira X, Durán-Yáñez A. Effects of pepper (*Capsicum chinense*) genotypic diversity on insect herbivores. *Agr Forest Entomol*, 2015. 17: 433–438. <https://doi.org/10.1111/afe.12125>
49. McArt S. H., Thaler J. S. Plant genotypic diversity reduces the rate of consumer resource utilization. *Proc R Soc Lond B Biol Sci*. 2013; 280: 20130639. <http://doi.org/10.1098/rspb.2013.0639>
50. Heiling S, Schuman MC, Schoettner M, Mukerjee P, Berger B, Schneider B, et al. Jasmonate and ppHsystemin regulate key malonylation steps in the biosynthesis of 17-hydroxygeranylinalool diene glycosides, an abundant and effective direct defense against herbivores in *Nicotiana attenuata*. *Plant Cell*. 2010; 22: 273–292. <https://doi.org/10.1105/tpc.109.071449> PMID: 20081114
51. Rayapuram C, Baldwin IT. Using nutritional indices to study *LOX3*-dependent insect resistance. *Plant Cell Environ*. 2006; 29: 1585–1594. <https://doi.org/10.1111/j.1365-3040.2006.01534.x> PMID: 16898019
52. Wang L, Allmann S, Wu J, Baldwin IT. Comparisons of *LIPOXYGENASE3*- and *JASMONATE-RESISTANT4/6*-silenced plants reveal that jasmonic acid and jasmonic acid-amino acid conjugates play different roles in herbivore resistance of *Nicotiana attenuata*. *Plant Physiol*. 2008; 146: 904–915. <https://doi.org/10.1104/pp.107.109264> PMID: 18065562
53. Howe GA, Jander G. Plant immunity to insect herbivores. *Annu Rev Plant Biol*. 2008; 59: 41–66. <https://doi.org/10.1146/annurev.arplant.59.032607.092825> PMID: 18031220
54. Larrieu A, Vernoux T. Q&A: How does jasmonate signaling enable plants to adapt and survive? *BMC Biol*. 2016; 14: 79. <https://doi.org/10.1186/s12915-016-0308-8> PMID: 27643853
55. Schuman MC, Baldwin IT. The layers of plant responses to insect herbivores. *Annu Rev Entomol*. 2016; 61: 373–394. <https://doi.org/10.1146/annurev-ento-010715-023851> PMID: 26651543
56. Lynds GY, Baldwin IT. Fire, nitrogen, and defensive plasticity in *Nicotiana attenuata*. *Oecologia*. 1998; 115: 531–540. <https://doi.org/10.1007/PL00008820> PMID: 28308274
57. Halitschke R, Baldwin IT. Jasmonates and related compounds in plant-insect interactions. *J Plant Growth Regul*. 2005; 23: 238–245. <https://doi.org/10.1007/s00344-004-0037-z>
58. Steppuhn A, Baldwin IT. Induced defenses and the cost-benefit paradigm. In: Schaller A, editor. *Induced Plant Resistance to Herbivory*. Springer Science, Business Media B. V.: Dordrecht, The Netherlands. 2008. pp. 61–83. [https://doi.org/10.1007/978-1-4020-8182-8\\_3](https://doi.org/10.1007/978-1-4020-8182-8_3)
59. Hummel GM, Naumann M, Schurr U, Walter A. Root growth dynamics of *Nicotiana attenuata* seedlings are affected by simulated herbivore attack. *Plant Cell Environ*. 2007; 30: 1326–1336. <https://doi.org/10.1111/j.1365-3040.2007.01718.x> PMID: 17727422
60. Hummel GM, Schurr U, Baldwin IT, Walter A. Herbivore-induced jasmonic acid bursts in leaves of *Nicotiana attenuata* mediate short-term reductions in root growth. *Plant, Cell Environ*. 2009; 32: 134–143. <https://doi.org/10.1111/j.1365-3040.2008.01905.x> PMID: 19054344
61. Ullmann-Zeunert L, Stanton MA, Wielsch N, Bartram S, Hummert C, Svatoš A, et al. Quantification of growth-defense trade-offs in a common currency: Nitrogen required for phenolamide biosynthesis is not derived from ribulose-1,5-bisphosphate carboxylase/oxygenase turnover. *Plant J*. 2013; 75: 417–429. <https://doi.org/10.1111/tpj.12210> PMID: 23590461
62. Machado RAR, Arce CCM, Ferrieri AP, Baldwin IT, Erb M. Jasmonate-dependent depletion of soluble sugars compromises plant resistance to *Manduca sexta*. *New Phytol*. 2015; 207: 91–105. <https://doi.org/10.1111/nph.13337> PMID: 25704234
63. Pfisterer AB, Schmid B, Andrea BP, Schmid B. Diversity-dependent production can decrease the stability of ecosystem functioning. *Nature*. 2002; 416: 84–86. <https://doi.org/10.1038/416084a> PMID: 11882897
64. Loreau M, de Mazancourt C. Biodiversity and ecosystem stability: A synthesis of underlying mechanisms. *Ecol Lett*. 2013; 16: 106–115. <https://doi.org/10.1111/ele.12073> PMID: 23346947
65. MacArthur R. Fluctuations of animal populations and a measure of community stability. *Ecology*. 1955; 36: 533–536.
66. Elton CS. *The ecology of invasions by animals and plants*. London, UK: Methuen; 1958.
67. Tilman D, Downing JA. Biodiversity and stability in grasslands. *Nature*. 1994; 367: 363–365. <https://doi.org/10.1038/367363a0>
68. Reusch TBH, Ehlers A, Hammerli A, Worm B. Ecosystem recovery after climatic extremes enhanced by genotypic diversity. *Proc Natl Acad Sci U S A*. 2005; 102: 2826–2831. <https://doi.org/10.1073/pnas.0500008102> PMID: 15710890

69. Tilman D, Reich PB, Knops JMH. Biodiversity and ecosystem stability in a decade-long grassland experiment. *Nature*. 2006; 441: 629–632. <https://doi.org/10.1038/nature04742> PMID: 16738658
70. Wright JP, Ames G, Mitchell RM. The more things change the more they stay the same? Importance of trait variability for ecosystem function stability in a changing environment. *Phil. Trans. R. Soc. B*. 2016; 371: 20150272. <https://doi.org/10.1098/rstb.2015.0272> PMID: 27114574
71. McCann KS. The diversity-stability debate. *Nature*. 2000; 405: 228–233. <https://doi.org/10.1038/35012234> PMID: 10821283
72. Dovčiak M, Halpern CB. Positive diversity-stability relationships in forest herb populations during four decades of community assembly. *Ecol Lett*. 2010; 13: 1300–1309. <https://doi.org/10.1111/j.1461-0248.2010.01524.x> PMID: 20735464
73. Wetzel WC, Kharouba HM, Robinson M, Holyoak M, Karban R. Variability in plant nutrients reduces insect herbivore performance. *Nature*. 2016; 539: 425–7. <https://doi.org/10.1038/nature20140> PMID: 27749815
74. Petchey OL, Pontarp M, Massie TM, Kéfi S, Ozgul A, Weilenmann M, et al. The ecological forecast horizon, and examples of its uses and determinants. *Ecol Lett*. 2015; 18: 597–611. <https://doi.org/10.1111/ele.12443> PMID: 25960188
75. Jarvis DI, Brown AHD, Cuong PH, Collado-Panduro L, Latournerie-Moreno L, Gyawali S, et al. A global perspective of the richness and evenness of traditional crop-variety diversity maintained by farming communities. *Proc Natl Acad Sci U S A*. 2008; 105: 5326–5331. <https://doi.org/10.1073/pnas.0800607105> PMID: 18362337
76. Hajjar R, Jarvis DI, Gemmill-Herren B. The utility of crop genetic diversity in maintaining ecosystem services. *Agric Ecosyst Environ*. 2008; 123: 261–270. <https://doi.org/10.1016/j.agee.2007.08.003>
77. Hersch-Green EI, Turley NE, Johnson MTJ. Community genetics: what have we accomplished and where should we be going? *Philos Trans R Soc Lond B Biol Sci*. 2011; 366: 1453–1460. <https://doi.org/10.1098/rstb.2010.0331> PMID: 21444318
